# Supplementary material for: Measuring patient-perceived continuity of care for patients with long-term conditions in primary care
Source: Springer Nature journal article supplement (doi:10.1186/s12875-014-0191-8), 2014-12-01
Supplement: MOESM1 [file 9737516]

Appendix A:

**THE CHAO CONTINUITY QUESTIONNAIRE**

© Dr. Jason Chao M.D., M.S. Associate Professor of Family Medicine, Case Western Reserve University, Cleveland, Ohio.

| <b>1. PLEASE USE A SCALE OF 1 TO 5 TO INDICATE HOW TRUE OR FALSE YOU FEEL EACH OF THE FOLLOWING STATEMENTS IS:</b> |                    |                  |                     |                         |
|--------------------------------------------------------------------------------------------------------------------|--------------------|------------------|---------------------|-------------------------|
| <b>DEFINITELY TRUE</b>                                                                                             | <b>MOSTLY TRUE</b> | <b>UNCERTAIN</b> | <b>MOSTLY FALSE</b> | <b>DEFINITELY FALSE</b> |
| <b>1</b>                                                                                                           | <b>2</b>           | <b>3</b>         | <b>4</b>            | <b>5</b>                |
| Please write your score in the box next to the question                                                            |                    |                  |                     |                         |
| A. If more than one family member needs medical care, we go to different doctors.                                  |                    |                  |                     |                         |
| B. My doctor often mentions or refers to my past medical problems and treatments.                                  |                    |                  |                     |                         |
| C. I receive my medical care at more than one location.                                                            |                    |                  |                     |                         |
| D. The doctor has a list of all the medicines which I am taking now.                                               |                    |                  |                     |                         |
| E. I rarely see the same doctor when I go for medical care.                                                        |                    |                  |                     |                         |
| F. My medical care improves when the doctor has seen me before.                                                    |                    |                  |                     |                         |
| G. I have medical problems that the doctor doesn't know about.                                                     |                    |                  |                     |                         |
| H. My doctor provides care for any type of problem which I may have.                                               |                    |                  |                     |                         |

| <b>2. PLEASE INDICATE YOUR OPINION OF THE FOLLOWING STATEMENTS, USING THE SCALE 1 TO 5:</b>                |              |                  |                 |                          |
|------------------------------------------------------------------------------------------------------------|--------------|------------------|-----------------|--------------------------|
| <b>AGREE STRONGLY</b>                                                                                      | <b>AGREE</b> | <b>UNCERTAIN</b> | <b>DISAGREE</b> | <b>STRONGLY DISAGREE</b> |
| <b>1</b>                                                                                                   | <b>2</b>     | <b>3</b>         | <b>4</b>        | <b>5</b>                 |
| Please write your score in the box next to the question                                                    |              |                  |                 |                          |
| A. I feel that I have an on-going relationship with a doctor.                                              |              |                  |                 |                          |
| B. It is difficult to bring up unrelated medical problems with the doctor.                                 |              |                  |                 |                          |
| C. I am uncomfortable in discussing a personal problem with the doctor.                                    |              |                  |                 |                          |
| D. The doctor knows a lot about the rest of my family.                                                     |              |                  |                 |                          |
| E. I feel comfortable asking questions of the doctor.                                                      |              |                  |                 |                          |
| F. The doctor doesn't know about my family problems.                                                       |              |                  |                 |                          |
| G. The doctor does not explain things to me.                                                               |              |                  |                 |                          |
| H. In an emergency, I want my regular doctor to see me.                                                    |              |                  |                 |                          |
| I. I would rather see another doctor right away, instead of waiting a day or two to see my regular doctor. |              |                  |                 |                          |
| J. My doctor provides appropriate referrals to other specialists.                                          |              |                  |                 |                          |
| K. My doctor would take care of me if I had to go to the hospital.                                         |              |                  |                 |                          |
| L. My doctor would take care of me if I require emergency care.                                            |              |                  |                 |                          |
| M. I trust a specialist recommended by my doctor.                                                          |              |                  |                 |                          |
| N. My doctor would know me by name if we met on the street.                                                |              |                  |                 |                          |
| O. I trust my doctor.                                                                                      |              |                  |                 |                          |
